# Sampling networks of ecological interactions

Pedro Jordano<sup>\*a</sup>

<sup>a</sup>Integrative Ecology Group, Estación Biológica de Doñana, Consejo Superior de Investigaciones Científicas (EBD-CSIC), Avenida Americo Vesputio s/n, E-41092 Sevilla, Spain

Sevilla, September 2, 2015

## Summary

1. Sampling ecological interactions presents similar challenges, problems, potential biases, and constraints as sampling individuals and species in biodiversity inventories. Interactions are just pairwise relationships among individuals of two different species, such as those among plants and their seed dispersers in frugivory interactions or those among plants and their pollinators. Sampling interactions is a fundamental step to build robustly estimated interaction networks, yet few analyses have attempted a formal approach to their sampling protocols.

---

\*jordano@ebd.csic.es

2. Robust estimates of the actual number of interactions (links) within diversified ecological networks require adequate sampling effort that needs to be explicitly gauged. Yet we still lack a sampling theory explicitly focusing on ecological interactions.
3. While the complete inventory of interactions is likely impossible, a robust characterization of its main patterns and metrics is probably realistic. We must acknowledge that a sizable fraction of the maximum number of interactions  $I_{max}$  among, say,  $A$  animal species and  $P$  plant species (i.e.,  $I_{max} = AP$ ) is impossible to record due to forbidden links, i.e., life-history restrictions. Thus, the number of observed interactions  $I$  in robustly sampled networks is typically  $I \ll I_{max}$ , resulting in extremely sparse interaction matrices with low connectance.
4. Reasons for forbidden links are multiple but mainly stem from spatial and temporal uncoupling of partner species encounters and from intrinsically low probabilities of interspecific encounter for many of the potential pairwise interactions. Adequately assessing the completeness of a network of ecological interactions thus needs a deep knowledge of the natural history details embedded, so that forbidden links can be “discounted” when addressing sampling effort.
5. Here I provide a review and outline a conceptual framework for interaction sampling by building an explicit analogue to individuals and species sampling, thus extending diversity-monitoring approaches to the characterization of complex networks of ecological interactions. This is crucial to assess the fast-paced and devastating effects of defaunation-driven loss of key ecological

Jordano - Sampling networks

interactions and the services they provide.

## Keywords

complex networks, food webs, frugivory, mutualism, plant-animal interactions, pollination, seed dispersal

## Introduction

Biodiversity sampling is a labour-intensive activity, and sampling is often not sufficient to detect all or even most of the species present in an assemblage. Gotelli & Colwell (2011).

1 Biodiversity species assessment aims at sampling individuals in collections and  
2 determining the number of species represented. Given that, by definition, samples  
3 are incomplete, these collections enumerate a lower number of the species actually  
4 present. The ecological literature dealing with robust estimators of species rich-  
5 ness and diversity in collections of individuals is immense, and a number of useful  
6 approaches have been used to obtain such estimates (Magurran, 1988; Gotelli &  
7 Colwell, 2001; Hortal, Borges & Gaspar, 2006; Colwell, 2009; Gotelli & Colwell,  
8 2011). Recent effort has been also focused at defining essential biodiversity vari-  
9 ables (EBV) (Pereira *et al.*, 2013) that can be sampled and measured repeatedly  
10 to complement biodiversity estimates. Yet sampling species or taxa-specific EBVs  
11 is just probing a single component of biodiversity; interactions among species are  
12 another fundamental component, the one that supports the existence, but in some

13 cases also the extinction, of species. For example, the extinction of interactions  
14 represents a dramatic loss of biodiversity because it entails the loss of fundamental  
15 ecological functions (Valiente-Banuet *et al.*, 2014). This missed component of bio-  
16 diversity loss, the extinction of ecological interactions, very often accompanies, or  
17 even precedes, species disappearance. Interactions among species are a key com-  
18 ponent of biodiversity and here I aim to show that most problems associated to  
19 sampling interactions in natural communities have to do with problems associated  
20 to sampling species diversity, even worse. I consider pairwise interactions among  
21 species at the habitat level, in the context of alpha diversity and the estimation  
22 of local interaction richness from sampling data (Mao & Colwell, 2005). In the  
23 first part I provide a succinct overview of previous work addressing sampling issues  
24 for ecological interaction networks. In the second part, after a short overview of  
25 asymptotic diversity estimates (Gotelli & Colwell, 2001), I discuss specific ratio-  
26 nales for sampling the biodiversity of ecological interactions. Most of my examples  
27 come from the analysis of plant-animal interaction networks, yet are applicable to  
28 other types of species-species interactions.

29 Interactions can be a much better indicator of the richness and diversity of  
30 ecosystem functions than a simple list of taxa and their abundances and/or re-  
31 lated biodiversity indicator variables (EBVs). Thus, sampling interactions should  
32 be a central issue when identifying and diagnosing ecosystem services (e.g., polli-  
33 nation, natural seeding by frugivores, etc.). Fortunately, all the whole battery of  
34 biodiversity-related tools used by ecologists to sample biodiversity (species, *sensu*  
35 *stricto*) can be extended and applied to the sampling of interactions. Analogs  
36 are evident between these approaches (Colwell, Dunn & Harris, 2012). Monitor-  
37 ing interactions is analogous to any biodiversity sampling [i.e., a species inventory

Jordano - Sampling networks

38 Jordano (1987); Jordano, Vázquez & Bascompte (2009)] and is subject to similar  
39 methodological shortcomings, especially under-sampling (Coddington *et al.*, 2009;  
40 Vazquez, Chacoff & Cagnolo, 2009; Dorado *et al.*, 2011; Rivera-Hutinel *et al.*,  
41 2012). For example, when we study mutualistic networks, our goal is to make an  
42 inventory of the distinct pairwise interactions that made up the network. We are  
43 interested in having a complete list of all the pairwise interactions among species  
44 (e.g., all the distinct, species-species interactions, or links, among the pollinators  
45 and flowering plants) that can exist in a given community. Sampling these in-  
46 teractions thus entails exactly the same problems, limitations, constraints, and  
47 potential biases as sampling individual organisms and species diversity. As Mao &  
48 Colwell (2005) put it, these are the workings of Preston’s demon, the moving “veil  
49 line” between the detected and the undetected interactions as sample size increases  
50 (Preston, 1948).

51 Early efforts to recognize and solve sampling problems in analyses of interac-  
52 tions stem from research on food webs and to determine how undersampling biases  
53 food web metrics (Martinez, 1991; Cohen *et al.*, 1993; Martinez, 1993; Bersier,  
54 Banasek-Richter & Cattin, 2002; Brose, Martinez & Williams, 2003; Banasek-  
55 Richter, Cattin & Bersier, 2004; Wells & O’Hara, 2012). In addition, the myriad  
56 of classic natural history studies documenting animal diets, host-pathogen infection  
57 records, plant herbivory records, etc., represent efforts to document interactions  
58 occurring in nature. All of them share the problem of sampling incompleteness in-  
59 fluencing the patterns and metrics reported. Yet, despite the early recognition that  
60 incomplete sampling may seriously bias the analysis of ecological networks (Jor-  
61 dano, 1987), only recent studies have explicitly acknowledged it and attempted to  
62 determine its influence (Ollerton & Cranmer, 2002; Nielsen & Bascompte, 2007;

Jordano - Sampling networks

63 Vazquez, Chacoff & Cagnolo, 2009; Gibson *et al.*, 2011; Olesen *et al.*, 2011; Cha-  
64 coff *et al.*, 2012; Rivera-Hutinel *et al.*, 2012; Olito & Fox, 2014; Bascompte &  
65 Jordano, 2014; Vizentin-Bugoni, Maruyama & Sazima, 2014; Frund, McCann &  
66 Williams, 2015). The sampling approaches have been extended to predict patterns  
67 of coextinctions in interaction assemblages (e.g., hosts-parasites) (Colwell, Dunn &  
68 Harris, 2012). Most empirical studies provide no estimate of sampling effort, im-  
69 plicitly assuming that the reported network patterns and metrics are robust. Yet  
70 recent evidences point out that number of partner species detected, number of  
71 actual links, and some aggregate statistics describing network patterns, are prone  
72 to sampling bias (Nielsen & Bascompte, 2007; Dorado *et al.*, 2011; Olesen *et al.*,  
73 2011; Chacoff *et al.*, 2012; Rivera-Hutinel *et al.*, 2012; Olito & Fox, 2014; Frund,  
74 McCann & Williams, 2015). Most of these evidences, however, come either from  
75 simulation studies (Frund, McCann & Williams, 2015) or from relatively species-  
76 poor assemblages. Even for species-rich, tropical assemblages it might be erroneous  
77 to conclude that network data routinely come from insufficiently sampled datasets  
78 (Ollerton & Cranmer, 2002; Chacoff *et al.*, 2012), given the extremely sparse nature  
79 of these interaction matrices because of the prevalence of forbidden links (which,  
80 by definition, cannot be documented despite extensive sampling effort). However,  
81 most certainly, sampling limitations pervade biodiversity inventories in tropical  
82 areas (Coddington *et al.*, 2009) and we might rightly expect that frequent inter-  
83 actions may be over-represented and rare interactions may be missed entirely in  
84 studies of mega-diverse assemblages (Bascompte & Jordano, 2014); but, to what  
85 extent?

## 86 Sampling interactions: methods

87 When we sample interactions in the field we record the presence of two species that  
88 interact in some way. For example, Snow and Snow(1988) recorded an interaction  
89 whenever they saw a bird “touching” a fruit on a plant. We observe and record  
90 feeding observations, visitation, occupancy, presence in pollen loads or in fecal  
91 samples, etc., of *individual* animals or plants and accumulate pairwise interactions,  
92 i.e., lists of species partners and the frequencies with which we observe them.  
93 Therefore, estimating the sampling completeness of pairwise interactions for a  
94 whole network, requires some gauging of the sampling completeness (i.e., how the  
95 number (richness) of distinct pairwise interactions accumulates as sampling effort  
96 is increased) and/or estimating the uncertainty around the missed links (Wells &  
97 O’Hara, 2012).

98 Most types of ecological interactions can be illustrated with bipartite graphs,  
99 with two or more distinct groups of interacting partners (Bascompte & Jordano,  
100 2014); for illustration purposes I’ll focus more specifically on plant-animal interac-  
101 tions. Sampling interactions requires filling the cells of an interaction matrix with  
102 data. The matrix,  $\Delta = AP$ , is a 2D representation of the interactions among,  
103 say,  $A$  animal species (rows) and  $P$  plant species (columns) (Jordano, 1987; Bas-  
104 compte & Jordano, 2014). The matrix entries illustrate the values of the pairwise  
105 interactions visualized in the  $\Delta$  matrix, and can be 0 or 1, for presence-absence  
106 of a given pairwise interaction, or take a quantitative weight  $w_{ji}$  to represent the  
107 interaction intensity or unidirectional effect of species  $j$  on species  $i$  (Bascompte  
108 & Jordano, 2014; Vazquez *et al.*, 2015). The outcomes of most ecological inter-  
109 actions are dependent on frequency of encounters (e.g., visit rate of pollinators,

110 number of records of ant defenders, frequency of seeds in fecal samples). Thus,  
111 a frequently used proxy for interaction intensities  $w_{ji}$  is just how frequent new  
112 interspecific encounters are, whether or not appropriately weighted to estimate  
113 interaction effectiveness (Vazquez, Morris & Jordano, 2005).

114 We need to define two basic steps in the sampling of interactions: 1) which  
115 type of interactions we sample; and 2) which type of record we get to document  
116 the existence of an interaction. In step #1 we need to take into account whether  
117 we are sampling the whole community of interactor species (all the animals, all  
118 the plants) or just a subset of them, i.e., a sub matrix  $\Delta_{m,n}$  of  $m < A$  animal  
119 species and  $n < P$  plant species of the adjacency matrix  $\Delta_{AP}$ . Subsets can be:  
120 a) all the potential plants interacting with a subset of the animals (Fig. 1a); b)  
121 all the potential animal species interacting with a subset of the plant species (Fig.  
122 1b); c) a subset of all the potential animal species interacting with a subset of all  
123 the plant species (Fig. 1c). While some discussion has considered how to establish  
124 the limits of what represents a network (Strogatz, 2001) (in analogy to discussion  
125 on food-web limits; Cohen, 1978), it must be noted that situations a-c in Fig.  
126 1 do not represent complete interaction networks. As vividly stated by Cohen  
127 *et al.* (1993): “*As more comprehensive, more detailed, more explicit webs become*  
128 *available, smaller, highly aggregated, incompletely described webs may progressively*  
129 *be dropped from analyses of web structure (though such webs may remain useful for*  
130 *other purposes, such as pedagogy)*”. Subnet sampling is generalized in studies of  
131 biological networks (e.g., protein interactions, gene regulation), yet it is important  
132 to recognize that most properties of subnetworks (even random subsamples) do  
133 not represent properties of whole networks (Stumpf, Wiuf & May, 2005).

134 In step #2 above we face the problem of the type of record we take to sample



135 interactions. This is important because it defines whether we approach the problem  
136 of filling up the interaction matrix in a “zoo-centric” way or in a “phyto-centric”  
137 way. Zoo-centric studies directly sample animal activity and document the plants  
138 ‘touched’ by the animal. For example, analysis of pollen samples recovered from the  
139 body of pollinators, analysis of fecal samples of frugivores, radio-tracking data, etc.  
140 Phyto-centric studies take samples of focal individual plant species and document  
141 which animals ‘arrive’ or ‘touch’ the plants. Examples include focal watches of  
142 fruiting or flowering plants to record visitation by animals, raising insect herbivores  
143 from seed samples, identifying herbivory marks in samples of leaves, etc.

144 Most recent analyses of plant-animal interaction networks are phyto-centric;  
145 just 3.5% of available plant-pollinator ( $N = 58$ ) or 36.6% plant-frugivore ( $N = 22$ )  
146 interaction datasets are zoo-centric (see Schleuning *et al.*, 2012). Moreover, most  
147 available datasets on host-parasite (parasitoid) or plant-herbivore interactions are  
148 “host-centric” or phyto-centric (e.g., Thébault & Fontaine, 2010; Morris *et al.*,  
149 2013; Eklöf *et al.*, 2013). This may be related to a variety of causes, like preferred  
150 methodologies by researchers working with a particular group or system, logistic  
151 limitations, or inherent taxonomic focus of the research questions. A likely result  
152 of phyto-centric sampling would be adjacency matrices with large  $A : P$  ratios.  
153 In any case we don’t have a clear view of the potential biases that taxa-focused  
154 sampling may generate in observed network patterns, for example by generating  
155 consistently asymmetric interaction matrices (Dormann *et al.*, 2009). System sym-  
156 metry has been suggested to influence estimations of generalization levels in plants  
157 and animals when measured as  $I_A$  and  $I_P$  (Elberling & Olesen, 1999); thus, differ-  
158 ences in  $I_A$  and  $I_P$  between networks may arise from different  $A : P$  ratios rather  
159 than other ecological factors (Olesen & Jordano, 2002).

160 Interestingly enough, quite complete analyses of interaction networks can be  
161 obtained when combining both phyto-centric and zoo-centric sampling. For ex-  
162 ample, Bosch *et al.* (2009) showed that the addition of pollen load data on top  
163 of focal-plant sampling of pollinators unveiled a significant number of interac-  
164 tions, resulting in important network structural changes. Connectance increased  
165 1.43-fold, mean plant connectivity went from 18.5 to 26.4, and mean pollinator  
166 connectivity from 2.9 to 4.1; moreover, extreme specialist pollinator species (sin-  
167 gletons in the adjacency matrix) decreased 0.6-fold. (Olesen *et al.* 2011) identified  
168 pollen loads on sampled insects and added the new links to an observation-based  
169 visitation matrix, with an extra 5% of links representing the estimated number  
170 of missing links in the pollination network. The overlap between observational  
171 and pollen-load recorded links was only 33%, underscoring the value of combin-  
172 ing methodological approaches. Zoo-centric sampling has recently been extended  
173 with the use of DNA-barcoding, for example with plant-herbivore (Jurado-Rivera  
174 *et al.*, 2009), host-parasitoid (Wirta *et al.*, 2014), and plant-frugivore interactions  
175 (González-Varo, Arroyo & Jordano, 2014). For mutualistic networks we would ex-  
176 pect that zoo-centric sampling could help unveiling interactions for rare species or  
177 for relatively common species which are difficult to sample by direct observation.  
178 Future methodological work may provide significant advances showing how mixing  
179 different sampling strategies strengthens the completeness of network data. These  
180 mixed strategies may combine, for instance, timed watches at focal plants, spot  
181 censuses along walked transects, pollen load or seed contents analyses, monitoring  
182 with camera traps, and DNA barcoding records. We might expect increased power  
183 of these mixed sampling approaches when combining different methods from both  
184 phyto- and zoo-centric perspectives (Bosch *et al.*, 2009; Bluthgen, 2010). Note also

Jordano - Sampling networks

185 that the different methods could be applied in different combinations to the two  
186 distinct sets of species. However, there are no tested protocols and/or sampling  
187 designs for ecological interaction studies to suggest an optimum combination of  
188 approaches. Ideally, pilot studies would provide adequate information for each  
189 specific study setting.

## 190 **Sampling interactions: rationale**

191 The number of distinct pairwise interactions that we can record in a landscape  
192 (an area of relatively homogeneous vegetation, analogous to the one we would  
193 use to monitor species diversity) is equivalent to the number of distinct classes in  
194 which we can classify the recorded encounters among individuals of two different  
195 species. Yet, individual-based interaction networks have been only recently studied  
196 (Dupont, Trøjelsgaard & Olesen, 2011; Wells & O'Hara, 2012). The most usual  
197 approach has been to pool individual-based interaction data into species-based  
198 summaries, an approach that ignores the fact that only a fraction of individuals  
199 may actually interact given a per capita interaction effect (Wells & O'Hara, 2012).  
200 Wells & O'Hara (2012) illustrate the pros and cons of the approach. We walk in  
201 the forest and see a blackbird  $Tm$  picking an ivy  $Hh$  fruit and ingesting it: we  
202 have a record for  $Tm - Hh$  interaction. We keep advancing and record again a  
203 blackbird feeding on hawthorn  $Cm$  fruits so we record a  $Tm - Cm$  interaction;  
204 as we advance we encounter another ivy plant and record a blackcap swallowing a  
205 fruit so we now have a new  $Sa - Hh$  interaction, and so on. At the end we have  
206 a series of classes (e.g.,  $Sa - Hh$ ,  $Tm - Hh$ ,  $Tm - Cm$ , etc.), along with their  
207 observed frequencies. Bunge & Fitzpatrick (1993) review the main aspects and ap-

208 proaches to estimate the number of distinct classes  $C$  in a sample of observations.  
209 Our main problem then turns to estimate the number of true missed links, i.e.,  
210 those that can't be accounted for by biological constraints and that might suggest  
211 undersampling. Thus, the sampling of interactions in nature, as the sampling of  
212 species, is a cumulative process. In our analysis, we are not re-sampling individ-  
213 uals, but interactions, so we made interaction-based accumulation curves. If an  
214 interaction-based curve points towards a robust sampling, it does mean that no  
215 new interactions are likely to be recorded, irrespectively of the species, as it is a  
216 whole-network sampling approach (N. Gotelli, pers. com.). We add new, distinct,  
217 interactions recorded as we increase sampling effort (Fig. 2). We can obtain an  
218 Interaction Accumulation Curve (*IAC*) analogous to a Species cumulating Curve  
219 (*SAC*) (see Supplementary Online Material): the observed number of distinct  
220 pairwise interactions in a survey or collection as a function of the accumulated  
221 number of observations or samples (Colwell, 2009).

222 Our sampling above would have resulted in a vector  $n = [n_1 \dots n_C]'$  where  $n_i$  is  
223 the number of records in the  $i^{th}$  class. As stressed by Bunge & Fitzpatrick (1993),  
224 however, the  $i^{th}$  class would appear in the sample if and only if  $n_i > 0$ , and we  
225 don't know *a priori* which  $n_i$  are zero. So,  $n$  is not observable. Rather, what we  
226 get is a vector  $c = [c_1 \dots c_n]'$  where  $c_j$  is the number of classes represented  $j$  times  
227 in our sampling:  $c_1$  is the number of singletons (interactions recorded once),  $c_2$   
228 is the number of twin pairs (interactions wkth just two records),  $c_3$  the number  
229 of triplets, etc. The problem thus turns to be estimating the number of distinct  
230 classes  $C$  from the vector of  $c_j$  values and the frequency of unobserved interactions  
231 (see "The real missing links" below).

232 Estimating the number of interactions with resulting robust estimates of net-

work parameters is a central issue in the study of ecological interaction networks (Jordano, 1987; Bascompte & Jordano, 2014). In contrast with traditional species diversity estimates, sampling networks has the paradox that despite the potentially interacting species being present in the sampled assemblage (i.e., included in the  $A$  and  $P$  species lists), some of their pairwise interactions are impossible to be recorded. The reason is forbidden links. Independently of whether we sample full communities or subset communities we face a problem: some of the interactions that we can visualize in the empty adjacency matrix  $\Delta$  will simply not occur. Thus, independently of the sampling effort we put, we'll never document these pairwise interactions. With a total of  $AP$  "potential" interactions, a fraction of them are impossible to record, because they are forbidden (Jordano, Bascompte & Olesen, 2003; Olesen *et al.*, 2011). Forbidden links are non-occurrences of pairwise interactions that can be accounted for by biological constraints, such as spatio-temporal uncoupling (Jordano, 1987), size or reward mismatching, foraging constraints (e.g., accessibility) (Moré *et al.*, 2012), and physiological-biochemical constraints (Jordano, 1987). We still have extremely reduced information about the frequency of forbidden links in natural communities (Jordano, Bascompte & Olesen, 2003; Stang *et al.*, 2009; Vazquez, Chacoff & Cagnolo, 2009; Olesen *et al.*, 2011; Ibanez, 2012; Maruyama *et al.*, 2014; Vizentin-Bugoni, Maruyama & Sazima, 2014) (Table 1). Forbidden links are thus represented as structural zeroes in the interaction matrix, i.e., matrix cells that cannot get a non-zero value. We might expect different types of  $FL$  to occupy different parts of the  $\Delta$  matrix, with missing cells due to phenological uncoupling,  $FL_P$ , largely distributed in the lower-right half  $\Delta$  matrix and actually missed links  $ML$  distributed in its central part (Olesen *et al.*, 2010). Yet, most of these aspects remain understudied. Therefore, we need to account for

258 the frequency of these structural zeros in our matrix before proceeding. For ex-  
259 ample, most measurements of connectance  $C = I/(AP)$  implicitly ignore the fact  
260 that by taking the full product  $AP$  in the denominator they are underestimating  
261 the actual connectance value, i.e., the fraction of actual interactions  $I$  relative to  
262 the *biologically possible* ones, not to the total maximum  $I_{max} = AP$ .

263 Adjacency matrices are frequently sparse, i.e., they are densely populated with  
264 zeroes, with a fraction of them being structural (unobservable interactions) (Bas-  
265 compte & Jordano, 2014). Thus, it would be a serious interpretation error to  
266 attribute the sparseness of adjacency matrices for bipartite networks to undersam-  
267 pling. The actual typology of link types in ecological interaction networks is thus  
268 more complex than just the two categories of observed and unobserved interactions  
269 (Table 1). Unobserved interactions are represented by zeroes and belong to two  
270 categories. Missing interactions may actually exist but require additional sampling  
271 or a variety of methods to be observed. Forbidden links, on the other hand, arise  
272 due to biological constraints limiting interactions and remain unobservable in na-  
273 ture, irrespectively of sampling effort (Table 1). Forbidden links  $FL$  may actually  
274 account for a relatively large fraction of unobserved interactions  $UL$  when sam-  
275 pling taxonomically-restricted subnetworks (e.g., plant-hummingbird pollination  
276 networks) (Table 1). Phenological unmatching is also prevalent in most networks,  
277 and may add up to explain ca. 25–40% of the forbidden links, especially in highly  
278 seasonal habitats, and up to 20% when estimated relative to the total number  
279 of unobserved interactions (Table 2). In any case, we might expect that a frac-  
280 tion of the missing links  $ML$  would be eventually explained by further biological  
281 reasons, depending on the knowledge of natural details of the particular systems.  
282 Our goal as naturalists would be to reduce the fraction of  $UL$  which remain as

283 missing links; to this end we might search for additional biological constraints or  
284 increase sampling effort. For instance, habitat use patterns by hummingbirds in  
285 the Arima Valley network (Table 2; Snow & Snow, 1972) impose a marked pattern  
286 of microhabitat mismatches causing up to 44.5% of the forbidden links. A myr-  
287 iad of biological causes beyond those included as *FL* in Table 2 may contribute  
288 explanations for *UL*: limits of color perception and or partial preferences, pres-  
289 ence of secondary metabolites in fruit pulp and leaves, toxins and combinations  
290 of monosaccharides in nectar, etc. However, it is surprising that just the limited  
291 set of forbidden link types considered in Table 1 explain between 24.6–77.2% of  
292 the unobserved links. Notably, the Arima Valley, Santa Virgínia, and Hato Ratón  
293 networks have  $> 60\%$  of the unobserved links explained, which might be related  
294 to the fact that they are subnetworks (Arima Valley, Santa Virgínia) or relatively  
295 small networks (Hato Ratón). All this means that empirical networks may have  
296 sizable fractions of structural zeroes. Ignoring this biological fact may contribute  
297 to wrongly inferring undersampling of interactions in real-world assemblages.

298 To sum up, two elements of inference are required in the analysis of unobserved  
299 interactions in ecological interaction networks: first, detailed natural history infor-  
300 mation on the participant species that allows the inference of biological constraints  
301 imposing forbidden links, so that structural zeroes can be identified in the adja-  
302 cency matrix. Second, a critical analysis of sampling robustness and a robust  
303 estimate of the actual fraction of missing links,  $M$ , resulting in a robust estimate  
304 of  $I$ . In the next sections I explore these elements of inference. The basic proposal  
305 is to use *IACs* to assess the robustness of interaction sampling, then scale the  
306 asymptotic estimate of interactions richness to account for the unrealizable *FL*.

## 307 Asymptotic diversity estimates

Let's assume a sampling of the diversity in a specific locality, over relatively homogeneous landscape where we aim at determining the number of species present for a particular group of organisms. To do that we carry out transects or plot samplings across the landscape, adequately replicated so we obtain a number of samples. Briefly,  $S_{obs}$  is the total number of species observed in a sample, or in a set of samples.  $S_{est}$  is the estimated number of species in the community represented by the sample, or by the set of samples, where *est* indicates an estimator. With abundance data, let  $S_k$  be the number of species each represented by exactly  $k$  individuals in a single sample. Thus,  $S_0$  is the number of undetected species (species present in the community but not included in the sample),  $S_1$  is the number of singleton species (represented by just one individual),  $S_2$  is the number of doubleton species (species with two individuals), etc. The total number of individuals in the sample would be:

$$n = \sum_{k=1}^{S_{obs}} S_k$$

308

309 A frequently used asymptotic, bias corrected, non-parametric estimator is  $S_{Chao}$   
310 (Hortal, Borges & Gaspar, 2006; Chao, 2005; Colwell, 2013):

$$S_{Chao} = S_{obs} + \frac{S_1(S_1 - 1)}{2(S_2 + 1)}$$

311 Another frequently used alternative is the Chao2 estimator,  $S_{Chao2}$  (Gotelli &  
312 Colwell, 2001), which has been reported to have a limited bias for small sample



313 sizes (Colwell & Coddington, 1994; Chao, 2005):

$$S_{Chao2} = S_{obs} + \frac{S_1^2}{2S_2}$$

314 A plot of the cumulative number of species recorded,  $S_n$ , as a function of some  
315 measure of sampling effort (say,  $n$  samples taken) yields the species accumulation  
316 curve (SAC) or collector's curve (Colwell & Coddington, 1994). Such a curve  
317 eventually reaches an asymptote converging with  $S_{est}$ . Similarly, interaction accu-  
318 mulation curves (IAC), analogous to SACs, can be used to assess the robustness  
319 of interactions sampling for plant-animal community datasets (Jordano, 1987; Jor-  
320 dano, Vázquez & Bascompte, 2009; Olesen *et al.*, 2011). For instance, a random  
321 accumulator function (e.g., library `vegan` in the R Package, R Development Core  
322 Team, 2010) which finds the mean IAC and its standard deviation from random  
323 permutations of the data, or subsampling without replacement (Gotelli & Colwell,  
324 2001) can be used to estimate the expected number of distinct pairwise interactions  
325 included in a given sampling of records (Jordano, Vázquez & Bascompte, 2009;  
326 Olesen *et al.*, 2011). This is analogous to a biodiversity sampling matrix with  
327 species as rows and sampling units (e.g., quadrats) as columns (Jordano, Vázquez  
328 & Bascompte, 2009). In this way we effectively extend sampling theory developed  
329 for species diversity to the sampling of ecological interactions. Yet future theoret-  
330 ical work will be needed to formally assess the similarities and differences in the  
331 two approaches and developing biologically meaningful null models of expected  
332 interaction richness with added sampling effort.

## 333 Assessing sampling effort when recording interac- 334 tions

335 The basic method we can propose to estimate sampling effort and explicitly show  
336 the analogues with rarefaction analysis in biodiversity research is to vectorize the  
337 interaction matrix  $AP$  so that we get a vector of all the potential pairwise inter-  
338 actions ( $I_{max}$ , Table 1) that can occur in a community of  $A$  animal species and  
339  $P$  plant species. The new “species” we aim to sample are the pairwise interac-  
340 tions (Table 3). So, if we have in our community *Turdus merula* ( $Tm$ ) and *Rosa*  
341 *canina* ( $Rc$ ) and *Prunus mahaleb* ( $Pm$ ), our problem will be to sample 2 new  
342 “species”:  $Tm - Rc$  and  $Tm - Pm$ . In general, if we have  $A = 1...i$ , animal  
343 species and  $P = 1...j$  plant species, we’ll have a vector of “new” species to sample:  
344  $A_1P_1, A_1P_2, \dots, A_2P_1, A_2P_2, \dots, A_iP_j$ . We can represent the successive samples where  
345 we can potentially get records of these interactions in a matrix with the vectorized  
346 interaction matrix and columns representing the successive samples we take (Table  
347 3). This is simply a vectorized version of the interaction matrix.

348 Rarefaction analysis and diversity-accumulation analysis (Magurran, 1988; Hortal,  
349 Hortal, Borges & Gaspar, 2006) come up immediately with this type of dataset. This  
350 procedure plots the accumulation curve for the expected number of distinct pair-  
351 wise interactions recorded with increasing sampling effort (Jordano, Vázquez &  
352 Bascompte, 2009; Olesen *et al.*, 2011). Asymptotic estimates of interaction rich-  
353 ness and its associated standard errors and confidence intervals can thus be ob-  
354 tained (Hortal, Borges & Gaspar, 2006) (see Supplementary Online Material). It  
355 should be noted that the asymptotic estimate of interaction richness implicitly  
356 ignores the fact that, due to forbidden links, a number of pairwise interactions

357 among the  $I_{max}$  number specified in the adjacency matrix  $\Delta$  cannot be recorded,  
358 irrespective of sampling effort. Therefore, the asymptotic value most likely is an  
359 overestimate of the actual maximum number of links that can be present in an  
360 assemblage. If forbidden links are taken into account, the asymptotic estimate  
361 should be lower. Yet, to the best of my knowledge, there is no theory developed  
362 to estimate this “biologically real” asymptotic value. Not unexpectedly, most re-  
363 cent analyses of sampling effort in ecological network studies found evidences of  
364 undersampling (Chacoff *et al.*, 2012). This needs not to be true, especially when  
365 interaction subwebs are studied (Olesen *et al.*, 2011; Vizentin-Bugoni, Maruyama  
366 & Sazima, 2014), and once the issue of structural zeroes in the interaction matrices  
367 is effectively incorporated in the estimates.

368 For example, mixture models incorporating detectabilities have been proposed  
369 to effectively account for rare species (Mao & Colwell, 2005). In an analogous line,  
370 mixture models could be extended to samples of pairwise interactions, also with  
371 specific detectability values. These detection rate/odds could be variable among  
372 groups of interactions, depending on their specific detectability. For example,  
373 detectability of flower-pollinator interactions involving bumblebees could have a  
374 higher detectability than flower-pollinator pairwise interactions involving, say, ni-  
375 tidulid beetles. These more homogeneous groupings of pairwise interactions within  
376 a network define modules (Bascompte & Jordano, 2014), so we might expect that  
377 interactions of a given module (e.g., plants and their hummingbird pollinators; Fig.  
378 1a) may share similar detectability values, in an analogous way to species groups  
379 receiving homogeneous detectability values in mixture models (Mao & Colwell,  
380 2005). In its simplest form, this would result in a sample with multiple pairwise  
381 interactions detected, in which the number of interaction events recorded for each

382 distinct interaction found in the sample is recorded (i.e., a column vector in Table  
383 3, corresponding to, say, a sampling day). The number of interactions recorded for  
384 the  $i_{th}$  pairwise interaction (i.e.,  $A_i P_j$  in Table 3),  $Y_i$  could be treated as a Poisson  
385 random variable with a mean parameter  $\lambda_i$ , its detection rate. Mixture models  
386 (Mao & Colwell, 2005) include estimates for abundance-based data (their analo-  
387 gous in interaction sampling would be weighted data), where  $Y_i$  is a Poisson random  
388 variable with detection rate  $\lambda_i$ . This is combined with the incidence-based model,  
389 where  $Y_i$  is a binomial random variable (their analogous in interaction sampling  
390 would be presence/absence records of interactions) with detection odds  $\lambda_i$ . Let  
391  $T$  be the number of samples in an incidence-based data set. A Poisson/binomial  
392 density can be written as (Mao & Colwell, 2005):

$$g(y; \lambda) = \begin{cases} \frac{\lambda^y}{y!e^\lambda} & [1] \\ \binom{T}{y} \frac{\lambda^y}{(1+\lambda)^T} & [2] \end{cases}$$

393 where [1] corresponds to a weighted network, and [2] to a qualitative network.

394 The detection rates  $\lambda_i$  depend on the relative abundances  $\phi_i$  of the interactions,  
395 the probability of a pairwise interaction being detected when it is present, and the  
396 sample size (the number of interactions recorded), which, in turn, is a function  
397 of the sampling effort. Unfortunately, no specific sampling model has been de-  
398 veloped along these lines for species interactions and their characteristic features.  
399 For example, a complication factor might be that interaction abundances,  $\phi_i$ , in  
400 real assemblages are a function of the abundances of interacting species, that de-  
401 termine interspecific encounter rates; yet they also depend on biological factors  
402 that ultimately determine if the interaction occurs when the partner species are

403 present. For example,  $\lambda_i$  should be set to zero for all  $FL$ . In its simplest form,  $\phi_i$   
404 could be estimated from just the product of partner species abundances, an ap-  
405 proach recently used as a null model to assess the role of biological constraints in  
406 generating forbidden links and explaining interaction patterns (Vizentin-Bugoni,  
407 Maruyama & Sazima, 2014). Yet more complex models (e.g., Wells & O’hara  
408 2012) should incorporate not only interspecific encounter probabilities, but also  
409 interaction detectabilities, phenotypic matching and incidence of forbidden links.

## 410 **The *real* missing links**

411 Given that a fraction of unobserved interactions can be accounted for by for-  
412 bidden links, what about the remaining missing interactions? We have already  
413 discussed that some of these could still be related to unaccounted constraints, and  
414 still others would be certainly attributable to insufficient sampling. Would this  
415 always be the case? Multispecific assemblages of distinct taxonomic relatedness,  
416 whose interactions can be represented as bipartite networks (e.g., host-parasite,  
417 plant-animal mutualisms, plant-herbivore interactions- with two distinct sets of  
418 unrelated higher taxa), are shaped by interspecific encounters among individuals  
419 of the partner species (Fig. 2). A crucial ecological aspect limiting these inter-  
420 actions is the probability of interspecific encounter, i.e., the probability that two  
421 individuals of the partner species actually encounter each other in nature.

422 Given log-normally distributed abundances of the two species groups, the ex-  
423 pected “neutral” probabilities of interspecific encounter ( $PIE$ ) would be simply the  
424 product of the two lognormal distributions. Thus, we might expect that for low  
425  $PIE$  values, pairwise interactions would be either extremely difficult to sample, or

426 just simply non-occurring in nature. Consider the Nava de las Correhuelas inter-  
427 action web (NCH, Table 2), with  $A = 36$ ,  $P = 25$ ,  $I = 181$ , and almost half of the  
428 unobserved interactions not accounted for by forbidden links, thus  $M = 53.1\%$ .  
429 Given the robust sampling of this network (Jordano, Vázquez & Bascompte, 2009),  
430 a sizable fraction of these possible but missing links would be simply not occurring  
431 in nature, most likely by extremely low  $PIE$ , in fact asymptotically zero. Given  
432 the vectorized list of pairwise interactions for NCH, I computed the  $PIE$  values for  
433 each one by multiplying element wise the two species abundance distributions. The  
434  $PIE_{max} = 0.0597$ , being a neutral estimate, based on the assumption that interac-  
435 tions occur in proportion to the species-specific local abundances. With  $PIE_{median}$   
436  $< 1.4 \cdot 10^{-4}$  we may safely expect (note the quantile estimate  $Q_{75\%} = 3.27 \cdot 10^{-4}$ ) that  
437 a sizable fraction of these missing interactions may simply not occur according to  
438 this neutral expectation (Jordano, 1987; Olesen *et al.*, 2011) (neutral forbidden  
439 links, *sensu* Canard *et al.*, 2012). Which is the expected frequency for pairwise  
440 interactions? and, which is the expected probability for unobserved interactions?  
441 More specifically, which is the probability of missing interactions,  $M$  (i.e., the  
442 unobserved ones that cannot be accounted for as forbidden links)?

443 When we consider the vectorized interaction matrix, enumerating all pairwise  
444 interactions for the  $AP$  combinations, the expected probabilities of finding a given  
445 interaction can be estimated with a Good-Turing approximation (Good, 1953).  
446 The technique, developed by Alan Turing and I.J. Good with applications to lin-  
447 guistics and word analysis (Gale & Sampson, 1995) has been recently applied in  
448 ecology (Chao *et al.*, 2015), estimates the probability of recording an interaction  
449 of a hitherto unseen pair of partners, given a set of past records of interactions  
450 between other species pairs. Let a sample of  $N$  interactions so that  $n_r$  distinct

451 pairwise interactions have exactly  $r$  records. All Good-Turing estimators obtain  
452 the underlying frequencies of events as:

$$P(X) = \frac{(N_X + 1)}{T} \left(1 - \frac{E(1)}{T}\right) \quad (1)$$

453 where  $X$  is the pairwise interaction,  $N_X$  is the number of times interaction  $X$   
454 is recorded,  $T$  is the sample size (number of distinct interactions recorded) and  
455  $E(1)$  is an estimate of how many different interactions were recorded exactly once.  
456 Strictly speaking Equation (1) gives the probability that the next interaction type  
457 recorded will be  $X$ , after sampling a given assemblage of interacting species. In  
458 other words, we scale down the maximum-likelihood estimator  $\frac{n}{T}$  by a factor of  
459  $\frac{1-E(1)}{T}$ . This reduces all the probabilities for interactions we have recorded, and  
460 makes room for interactions we haven't seen. If we sum over the interactions we  
461 have seen, then the sum of  $P(X)$  is  $1 - \frac{1-E(1)}{T}$ . Because probabilities sum to one,  
462 we have the left-over probability of  $P_{new} = \frac{E(1)}{T}$  of seeing something new, where  
463 new means that we sample a new pairwise interaction.

464 Note, however, that Good-Turing estimators, as the traditional asymptotic  
465 estimators, do not account in our case for the forbidden interactions. To account for  
466 these *FL* I re-scaled the asymptotic estimates, so that a more meaningful estimate  
467 could be obtained (Table 4). The scaling was calculated as  $[Chao1*(I+ML)]/AP$ ,  
468 just correcting for the *FL* frequency, given that  $I+ML$  represent the total *feasible*  
469 interactions when discounting the forbidden links (Table 1). After scaling, observed  
470  $I$  values (Table 2) are within the *Chao1* and *ACE* asymptotic estimates but below  
471 the *ACE* estimates for Hato Ratón and Zackenberg (Table 4). Thus, even after  
472 re-scaling for *FL*, it is likely that adequate characterization of most interaction

473 networks will require intensive sampling effort.

## 474 Discussion

475 Recent work has inferred that most data available for interaction networks are  
476 incomplete due to undersampling, resulting in a variety of biased parameters and  
477 network patterns (Chacoff *et al.*, 2012). It is important to note, however, that  
478 in practice, many surveyed networks to date have been subnets of much larger  
479 networks. This is true for protein interaction, gene regulation, and metabolic  
480 networks, where only a subset of the molecular entities in a cell have been sam-  
481 pled (Stumpf, Wiuf & May, 2005). Despite recent attempts to document whole  
482 ecosystem meta-networks (Pocock, Evans & Memmott, 2012), it is likely that most  
483 ecological interaction networks will illustrate just major ecosystem compartments.  
484 Due to their high generalization, high temporal and spatial turnover, and high  
485 complexity of association patterns, adequate sampling of ecological interaction  
486 networks requires extremely large sampling effort. Undersampling of ecological  
487 networks may originate from the analysis of assemblage subsets (e.g., taxonomi-  
488 cally or functionally defined), and/or from logistically-limited sampling effort. It  
489 is extremely hard to robustly sample the set of biotic interactions even for rela-  
490 tively simple, species-poor assemblages; yet, concluding that all ecological network  
491 datasets are undersampled would be unrealistic. The reason stems from a biologi-  
492 cal fact: a sizeable fraction of the maximum, potential links that can be recorded  
493 among two distinct sets of species is simply unobservable, irrespective of sampling  
494 effort (Jordano, 1987).

495 Missing links are a characteristic feature of all plant-animal interaction net-



Jordano - Sampling networks

496 works, and likely pervade other ecological interactions. Important natural history  
497 details explain a fraction of them, resulting in unrealizable interactions (i.e., for-  
498 bidden interactions) that define structural zeroes in the interaction matrices and  
499 contribute to their extreme sparseness. Sampling interactions is a way to monitor  
500 biodiversity beyond the simple enumeration of component species and to develop  
501 efficient and robust inventories of functional interactions. Yet no sampling theory  
502 for interactions is available. Some key components of this sampling are analo-  
503 gous to species sampling and traditional biodiversity inventories; however, there  
504 are important differences. Focusing just on the realized interactions or treating  
505 missing interactions as the expected unique result of sampling bias would miss  
506 important components to understand how mutualisms coevolve within complex  
507 webs of interdependence among species.

508 Contrary to species inventories, a sizable fraction of non-observed pairwise  
509 interactions cannot be sampled, due to biological constraints that forbid their oc-  
510 currence. A re-scaling of traditional asymptotic estimates for interaction richness  
511 can be applied whenever the knowledge of natural history details about the study  
512 system is sufficient to estimate at least the main causes of forbidden links. More-  
513 over, recent implementations of inference methods for unobserved species (Chao  
514 *et al.*, 2015) or for individual-based data (Wells & O'Hara, 2012) can be combined  
515 with the forbidden link approach, yet they do not account either for the existence  
516 of these ecological constraints.

517 Ecological interactions provide the wireframe supporting the lives of species,  
518 and they also embed crucial ecosystem functions which are fundamental for sup-  
519 porting the Earth system. Yet we still have a limited knowledge of the biodiversity  
520 of ecological interactions, but they are being lost (extinct) at a very fast pace, fre-

Jordano - Sampling networks

521 quently preceding species extinctions (Valiente-Banuet *et al.*, 2014). We urgently  
522 need robust techniques to assess the completeness of ecological interactions net-  
523 works because this knowledge will allow the identification of the minimal compo-  
524 nents of their ecological complexity that need to be restored to rebuild functional  
525 ecosystems after perturbations.

## 526 Acknowledgements

527 I am indebted to Jens M. Olesen, Alfredo Valido, Jordi Bascompte, Thomas  
528 Lewinshon, John N. Thompson, Nick Gotelli, Carsten Dormann, and Paulo R.  
529 Guimaraães Jr. for useful and thoughtful discussion at different stages of this  
530 manuscript. Jeferson Vizentin-Bugoni kindly helped with the Sta Virgínia data.  
531 Jens M. Olesen kindly made available the Grundvad dataset; together with Robert  
532 Colwell, Néstor Pérez-Méndez, JuanPe González-Varo, and Paco Rodríguez pro-  
533 vided most useful comments to a final version of the ms. The study was supported  
534 by a Junta de Andalucía Excellence Grant (RNM-5731), as well as a Severo Ochoa  
535 Excellence Award from the Ministerio de Economía y Competitividad (SEV-2012-  
536 0262). The Agencia de Medio Ambiente, Junta de Andalucía, provided generous  
537 facilities that made possible my long-term field work in different natural parks.

## 538 Data accessibility

539 This review does not use new raw data, but includes some re-analyses of previously  
540 published material. All the original data supporting the paper, R code, supple-  
541 mentary figures, and summaries of analytical protocols is available at the author's

Jordano - Sampling networks

542 GitHub repository ([https://github.com/pedroj/MS\\_Network-Sampling](https://github.com/pedroj/MS_Network-Sampling)), with  
543 DOI: 10.5281/zenodo.29437.

## 544 References

545 Banasek-Richter, C., Cattin, M. & Bersier, L. (2004) Sampling effects and the ro-  
546 bustness of quantitative and qualitative food-web descriptors. *Journal of Theo-*  
547 *retical Biology*, **226**, 23–32.

548 Bascompte, J. & Jordano, P. (2014) *Mutualistic networks*. Monographs in Popu-  
549 lation Biology, No. 53. Princeton University Press, Princeton, NJ.

550 Bersier, L., Banasek-Richter, C. & Cattin, M. (2002) Quantitative descriptors of  
551 food-web matrices. *Ecology*, **83**, 2394–2407.

552 Bluthgen, N. (2010) Why network analysis is often disconnected from community  
553 ecology: A critique and an ecologist's guide. *Basic And Applied Ecology*, **11**,  
554 185–195.

555 Bosch, J., Martín González, A.M., Rodrigo, A. & Navarro, D. (2009) Plant-  
556 pollinator networks: adding the pollinator's perspective. *Ecology Letters*, **12**,  
557 409–419.

558 Brose, U., Martinez, N. & Williams, R. (2003) Estimating species richness: Sen-  
559 sitivity to sample coverage and insensitivity to spatial patterns. *Ecology*, **84**,  
560 2364–2377.

561 Bunge, J. & Fitzpatrick, M. (1993) Estimating the number of species: a review.  
562 *Journal of the American Statistical Association*, **88**, 364–373.

Jordano - Sampling networks

- 563 Canard, E., Mouquet, N., Marescot, L., Gaston, K.J., Gravel, D. & Mouillot,  
564 D. (2012) Emergence of structural patterns in neutral trophic networks. *PLoS*  
565 *ONE*, **7**, e38295.
- 566 Chacoff, N.P., Vazquez, D.P., Lomascolo, S.B., Stevani, E.L., Dorado, J. & Padrón,  
567 B. (2012) Evaluating sampling completeness in a desert plant-pollinator network.  
568 *Journal of Animal Ecology*, **81**, 190–200.
- 569 Chao, A. (2005) Species richness estimation. *Encyclopedia of Statistical Sciences*,  
570 pp. 7909–7916. Oxford University Press, New York, USA.
- 571 Chao, A., Hsieh, T.C., Chazdon, R.L., Colwell, R.K. & Gotelli, N.J. (2015) Un-  
572 veiling the species-rank abundance distribution by generalizing the Good-Turing  
573 sample coverage theory. *Ecology*, **96**, 1189–1201.
- 574 Coddington, J.A., Agnarsson, I., Miller, J.A., Kuntner, M. & Hormiga, G. (2009)  
575 Undersampling bias: the null hypothesis for singleton species in tropical arthro-  
576 pod surveys. *Journal of Animal Ecology*, **78**, 573–584.
- 577 Cohen, J.E. (1978) *Food webs and niche space*. Princeton University Press, Prince-  
578 ton, New Jersey, US.
- 579 Cohen, J.E., Beaver, R.A., Cousins, S.H., DeAngelis, D.L., Goldwasser, L., Heong,  
580 K.L., Holt, R.D., Kohn, A.J., Lawton, J.H., Martinez, N., O'Malley, R., Page,  
581 L.M., Patten, B.C., Pimm, S.L., Polis, G., Rejmanek, M., Schoener, T.W.,  
582 Schenly, K., Sprules, W.G., Teal, J.M., Ulanowicz, R., Warren, P.H., Wilbur,  
583 H.M. & Yodis, P. (1993) Improving food webs. *Ecology*, **74**, 252–258.

- 584 Colwell, R. & Coddington, J. (1994) Estimating terrestrial biodiversity through ex-  
585 trapolation. *Philosophical Transactions Of The Royal Society Of London Series*  
586 *B-Biological Sciences*, **345**, 101–118.
- 587 Colwell, R.K. (2009) Biodiversity: concepts, patterns, and measurement. *The*  
588 *Princeton Guide to Ecology* (ed. S.A. Levin), pp. 257–263. Princeton University  
589 Press, Princeton.
- 590 Colwell, R.K. (2013) EstimateS: Biodiversity Estimation. -, pp. 1–33.
- 591 Colwell, R.K., Dunn, R.R. & Harris, N.C. (2012) Coextinction and persistence of  
592 dependent species in a changing world. *Annual Review of Ecology Evolution and*  
593 *Systematics*, **43**, 183–203.
- 594 Dorado, J., Vazquez, D.P., Stevani, E.L. & Chacoff, N.P. (2011) Rareness and  
595 specialization in plant-pollinator networks. *Ecology*, **92**, 19–25.
- 596 Dormann, C.F., Frund, J., Bluthgen, N. & Gruber, B. (2009) Indices, graphs and  
597 null models: Analyzing bipartite ecological networks. *Open Ecology Journal*, **2**,  
598 7–24.
- 599 Dupont, Y.L., Trøjelsgaard, K. & Olesen, J.M. (2011) Scaling down from species  
600 to individuals: a flower–visitation network between individual honeybees and  
601 thistle plants. *Oikos*, **120**, 170–177.
- 602 Dupont, Y.L., Trøjelsgaard, K., Hagen, M., Henriksen, M.V., Olesen, J.M., Ped-  
603 ersen, N.M.E. & Kissling, W.D. (2014) Spatial structure of an individual-based  
604 plant-pollinator network. *Oikos*, **123**, 1301–1310.

- 605 Eklöf, A., Jacob, U., Kopp, J., Bosch, J., Castro-Urgal, R., Chacoff, N.P.,  
606 Dalsgaard, B., de Sassi, C., Galetti, M., Guimaraes, P.R., Lomáscolo, S.B.,  
607 Martín González, A.M., Pizo, M.A., Rader, R., Rodrigo, A., Tylianakis, J.M.,  
608 Vazquez, D.P. & Allesina, S. (2013) The dimensionality of ecological networks.  
609 *Ecology Letters*, **16**, 577–583.
- 610 Elberling, H. & Olesen, J.M. (1999) The structure of a high latitude plant-flower  
611 visitor system: the dominance of flies. *Ecography*, **22**, 314–323.
- 612 Frund, J., McCann, K.S. & Williams, N.M. (2015) Sampling bias is a challenge  
613 for quantifying specialization and network structure: lessons from a quantitative  
614 niche model. *Oikos*, pp. n/a–n/a.
- 615 Gale, W.A. & Sampson, G. (1995) Good-Turing frequency estimation without  
616 tears. *Journal of Quantitative Linguistics*, **2**, 217–237.
- 617 Gibson, R.H., Knott, B., Eberlein, T. & Memmott, J. (2011) Sampling method  
618 influences the structure of plant–pollinator networks. *Oikos*, **120**, 822–831.
- 619 González-Varo, J.P., Arroyo, J.M. & Jordano, P. (2014) Who dispersed the seeds?  
620 The use of DNA barcoding in frugivory and seed dispersal studies. *Methods in*  
621 *Ecology and Evolution*, **5**, 806–814.
- 622 Good, I.J. (1953) The population frequencies of species and the estimation of  
623 population parameters. *Biometrika*, **40**, 237–264.
- 624 Gotelli, N.J. & Colwell, R.K. (2011) Estimating species richness. *Biological Di-*  
625 *versity Frontiers in Measurement and Assessment* (eds. A.E. Magurran & B.J.  
626 McGill), pp. 39–54. Oxford University Press, Oxford, UK.

- 627 Gotelli, N. & Colwell, R. (2001) Quantifying biodiversity: procedures and pitfalls  
628 in the measurement and comparison of species richness. *Ecology Letters*, **4**,  
629 379–391.
- 630 Hortal, J., Borges, P. & Gaspar, C. (2006) Evaluating the performance of species  
631 richness estimators: sensitivity to sample grain size. *Journal of Animal Ecology*,  
632 **75**, 274–287.
- 633 Ibanez, S. (2012) Optimizing size thresholds in a plant–pollinator interaction web:  
634 towards a mechanistic understanding of ecological networks. *Oecologia*, **170**,  
635 233–242.
- 636 Jordano, P. (1987) Patterns of mutualistic interactions in pollination and seed dis-  
637 persal: connectance, dependence asymmetries, and coevolution. *The American*  
638 *Naturalist*, **129**, 657–677.
- 639 Jordano, P., Bascompte, J. & Olesen, J. (2003) Invariant properties in coevolu-  
640 tionary networks of plant-animal interactions. *Ecology Letters*, **6**, 69–81.
- 641 Jordano, P., Vázquez, D. & Bascompte, J. (2009) Redes complejas de interac-  
642 ciones planta—animal. *Ecología y evolución de interacciones planta-animal* (eds.  
643 R. Medel, R. Dirzo & R. Zamora), pp. 17–41. Editorial Universitaria, Santiago,  
644 Chile.
- 645 Jurado-Rivera, J.A., Vogler, A.P., Reid, C.A.M., Petitpierre, E. & Gomez-Zurita,  
646 J. (2009) DNA barcoding insect-host plant associations. *Proceedings Of The*  
647 *Royal Society B-Biological Sciences*, **276**, 639–648.

Jordano - Sampling networks

- 648 Magurran, A. (1988) *Ecological diversity and its measurement*. Princeton Univer-  
649 sity Press, Princeton, US.
- 650 Mao, C. & Colwell, R.K. (2005) Estimation of species richness: mixture models,  
651 the role of rare species, and inferential challenges. *Ecology*, **86**, 1143–1153.
- 652 Martinez, N.D. (1993) Effects of resolution on food web structure. *Oikos*, **66**,  
653 403–412.
- 654 Martinez, N. (1991) Artifacts or attributes? Effects of resolution on food-web  
655 patterns in Little Rock Lake food web. *Ecological Monographs*, **61**, 367–392.
- 656 Maruyama, P.K., Vizentin-Bugoni, J., Oliveira, G.M., Oliveira, P.E. & Dalsgaard,  
657 B. (2014) Morphological and spatio-temporal mismatches shape a neotropical  
658 savanna plant-hummingbird network. *Biotropica*, **46**, 740–747.
- 659 Moré, M., Amorim, F.W., Benitez-Vieyra, S., Medina, A.M., Sazima, M. &  
660 Cocucci, A.A. (2012) Armament Imbalances: Match and Mismatch in Plant-  
661 Pollinator Traits of Highly Specialized Long-Spurred Orchids. *PLoS ONE*, **7**,  
662 e41878.
- 663 Morris, R.J., Gripenberg, S., Lewis, O.T. & Roslin, T. (2013) Antagonistic inter-  
664 action networks are structured independently of latitude and host guild. *Ecology*  
665 *Letters*, **17**, 340–349.
- 666 Nielsen, A. & Bascompte, J. (2007) Ecological networks, nestedness and sampling  
667 effort. *Journal of Ecology*, **95**, 1134–1141–1141.
- 668 Olesen, J.M., Bascompte, J., Dupont, Y.L., Elberling, H. & Jordano, P. (2011)



- 669 Missing and forbidden links in mutualistic networks. *Proceedings Of The Royal*  
670 *Society B-Biological Sciences*, **278**, 725–732.
- 671 Olesen, J.M., Dupont, Y.L., O’gorman, E., Ings, T.C., Layer, K., Melin, C.J.,  
672 Trjelsgaard, K., Pichler, D.E., Rasmussen, C. & Woodward, G. (2010) From  
673 Broadstone to Zackenberg. *Advances in Ecological Research*, **42**, 1–69.
- 674 Olesen, J. & Jordano, P. (2002) Geographic patterns in plant-pollinator mutualistic  
675 networks. *Ecology*, **83**, 2416–2424.
- 676 Olito, C. & Fox, J.W. (2014) Species traits and abundances predict metrics of  
677 plant-pollinator network structure, but not pairwise interactions. *Oikos*, **124**,  
678 428–436.
- 679 Ollerton, J. & Cranmer, L. (2002) Latitudinal trends in plant-pollinator interac-  
680 tions: are tropical plants more specialised? *Oikos*, **98**, 340–350.
- 681 Pereira, H.M., Ferrier, S., Walters, M., Geller, G.N., Jongman, R.H.G., Scholes,  
682 R.J., Bruford, M.W., Brummitt, N., Butchart, S.H.M., Cardoso, A.C., Coops,  
683 N., Dulloo, E., Faith, D., Freyhof, J., Gregory, R.D., Heip, C., Hoft, R., Hurtt,  
684 G., Jetz, W., Karp, D.S., Mcgeoch, M., Obura, D., Onoda, Y., Pettorelli, N.,  
685 Reyers, B., Sayre, R., Scharlemann, J.P.W., Stuart, S., Turak, E., Walpole, M.  
686 & Wegmann, M. (2013) Essential biodiversity variables. *Science*, **339**, 277–278.
- 687 Pocock, M.J.O., Evans, D.M. & Memmott, J. (2012) The Robustness and Restora-  
688 tion of a Network of Ecological Networks. *Science*, **335**, 973–977.
- 689 Preston, F. (1948) The commonness, and rarity, of species. *Ecology*, **29**, 254–283.

- 690 R Development Core Team (2010) *R: A language and environment for statis-*  
691 *tical computing*. R Foundation for Statistical Computing. Vienna, Austria.  
692 <http://www.R-project.org>, Vienna, Austria.
- 693 Rivera-Hutinel, A., Bustamante, R.O., Marín, V.H. & Medel, R. (2012) Effects of  
694 sampling completeness on the structure of plant-pollinator networks. *Ecology*,  
695 **93**, 1593–1603.
- 696 Schleuning, M., Frund, J., Klein, A.M., Abrahamczyk, S., Alarcón, R., Albrecht,  
697 M., Andersson, G.K.S., Bazarian, S., Böhning-Gaese, K., Bommarco, R., Dals-  
698 gaard, B., Dehling, D.M., Gotlieb, A., Hagen, M., Hickler, T., Holzschuh, A.,  
699 Kaiser-Bunbury, C.N., Kreft, H., Morris, R.J., Sandel, B., Sutherland, W.J.,  
700 Svenning, J.C., Tschardtke, T., Watts, S., Weiner, C.N., Werner, M., Williams,  
701 N.M., Winqvist, C., Dormann, C.F. & Blüthgen, N. (2012) Specialization of  
702 mutualistic interaction networks decreases toward tropical latitudes. *Current*  
703 *Biology*, **22**, 1925–1931.
- 704 Snow, B. & Snow, D. (1972) Feeding niches of hummingbirds in a Trinidad valley.  
705 *Journal of Animal Ecology*, **41**, 471–485.
- 706 Snow, B. & Snow, D. (1988) *Birds and berries*. Poyser, Calton, UK.
- 707 Stang, M., Klinkhamer, P., Waser, N.M., Stang, I. & van der Meijden, E. (2009)  
708 Size-specific interaction patterns and size matching in a plant-pollinator inter-  
709 action web. *Annals Of Botany*, **103**, 1459–1469.
- 710 Strogatz, S. (2001) Exploring complex networks. *Nature*, **410**, 268–276.
- 711 Stumpf, M.P.H., Wiuf, C. & May, R.M. (2005) Subnets of scale-free networks are

712 not scale-free: Sampling properties of networks. *Proceedings of the National*  
713 *Academy of Sciences USA*, **102**, 4221–4224.

714 Thébault, E. & Fontaine, C. (2010) Stability of ecological communities and the  
715 architecture of mutualistic and trophic networks. *Science*, **329**, 853–856.

716 Valiente-Banuet, A., Aizen, M.A., Alcántara, J.M., Arroyo, J., Cocucci, A.,  
717 Galetti, M., García, M.B., García, D., Gomez, J.M., Jordano, P., Medel, R.,  
718 Navarro, L., Obeso, J.R., Oviedo, R., Ramírez, N., Rey, P.J., Traveset, A.,  
719 Verdú, M. & Zamora, R. (2014) Beyond species loss: the extinction of ecological  
720 interactions in a changing world. *Functional Ecology*, **29**, 299–307.

721 Vazquez, D.P., Chacoff, N.P. & Cagnolo, L. (2009) Evaluating multiple deter-  
722 minants of the structure of plant-animal mutualistic networks. *Ecology*, **90**,  
723 2039–2046.

724 Vazquez, D.P., Ramos-Jiliberto, R., Urbani, P. & Valdovinos, F.S. (2015) A con-  
725 ceptual framework for studying the strength of plant-animal mutualistic inter-  
726 actions. *Ecology Letters*, **18**, 385–400.

727 Vazquez, D., Morris, W. & Jordano, P. (2005) Interaction frequency as a surrogate  
728 for the total effect of animal mutualists on plants. *Ecology Letters*, **8**, 1088–1094.

729 Vizentin-Bugoni, J., Maruyama, P.K. & Sazima, M. (2014) Processes entangling  
730 interactions in communities: forbidden links are more important than abundance  
731 in a hummingbird-plant network. *Proceedings Of The Royal Society B-Biological*  
732 *Sciences*, **281**, 20132397–20132397.

733 Wells, K. & O'Hara, R.B. (2012) Species interactions: estimating per-individual

Jordano - Sampling networks

734 interaction strength and covariates before simplifying data into per-species eco-  
735 logical networks. *Methods in Ecology and Evolution*, **4**, 1–8.

736 Wirta, H.K., Hebert, P.D.N., Kaartinen, R., Prosser, S.W., Várkonyi, G. & Roslin,  
737 T. (2014) Complementary molecular information changes our perception of food  
738 web structure. *Proceedings of the National Academy of Sciences USA*, **111**,  
739 1885–1890.

## 740 Figure captions

741 **Figure 1.** Sampling ecological interaction networks (e.g., plant-animal interac-  
742 tions) usually focus on different types of subsampling the full network, yielding  
743 submatrices  $\Delta[m, n]$  of the full interaction matrix  $\Delta$  with  $A$  and  $P$  animal and  
744 plant species. a) all the potential plants interacting with a subset of the animals  
745 (e.g., studying just the hummingbird-pollinated flower species in a community);  
746 b) all the potential animal species interacting with a subset of the plant species  
747 (e.g., studying the frugivore species feeding on figs *Ficus* in a community); and c)  
748 sampling a subset of all the potential animal species interacting with a subset of all  
749 the plant species (e.g., studying the plant-frugivore interactions of the rainforest  
750 understory).

751

752 **Figure 2.** Sampling species interactions in natural communities. Suppose an  
753 assemblage with  $A = 3$  animal species (red, species 1–3 with three, two, and 1  
754 individuals, respectively) and  $P = 3$  plant species (green, species a-c with three  
755 individuals each) (colored balls), sampled with increasing effort in steps 1 to 6  
756 (panels). In Step 1 we record animal species 1 and plant species 1 and 2 with  
757 a total of three interactions (black lines) represented as two distinct interactions:  
758  $1 - a$  and  $1 - b$ . As we advance our sampling (panels 1 to 6, illustrating e.g.,  
759 additional sampling days) we record new distinct interactions. Note that we actu-  
760 ally sample and record interactions among individuals, yet we pool the data across  
761 species to get a species by species interaction matrix. Few network analyses have  
762 been carried out on individual data(Dupont *et al.*, 2014).

763

764 **Figures**

Figure 1:

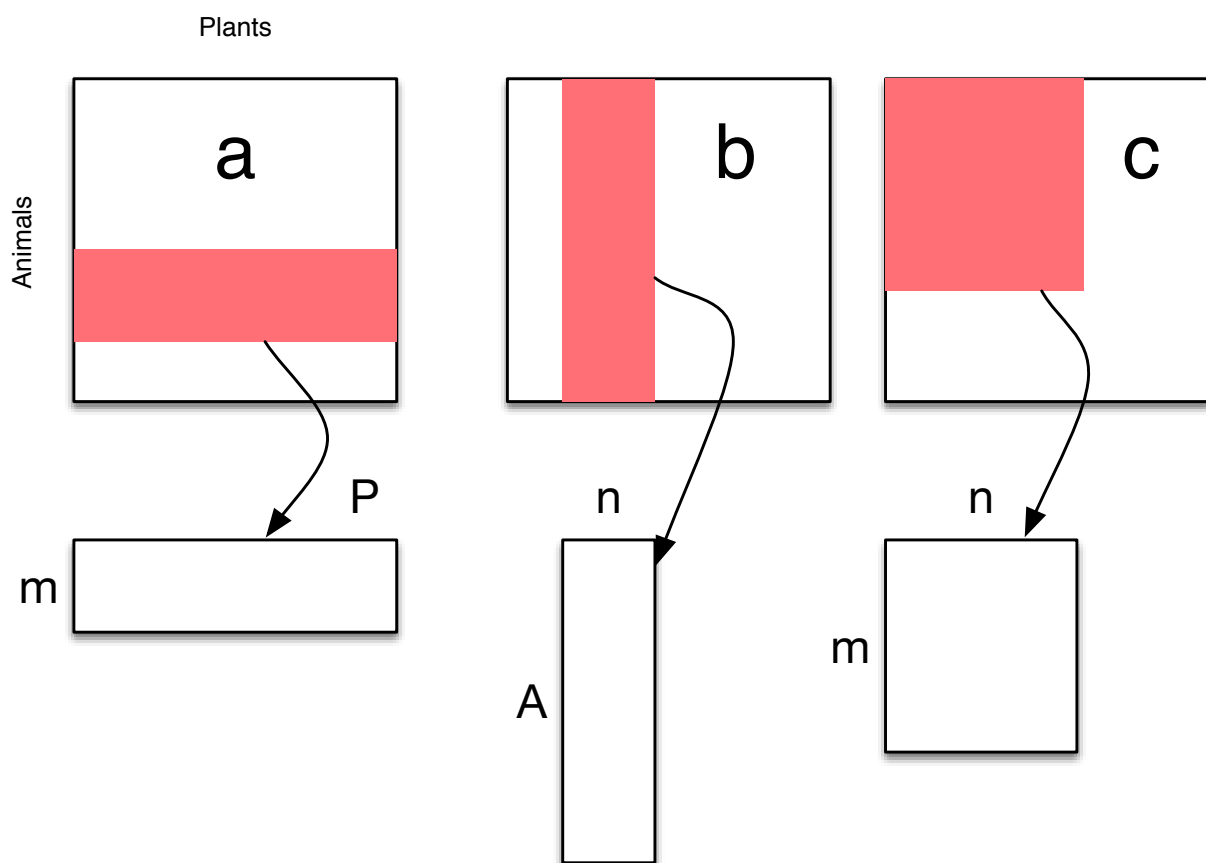

Jordano - Sampling networks

Figure 2:

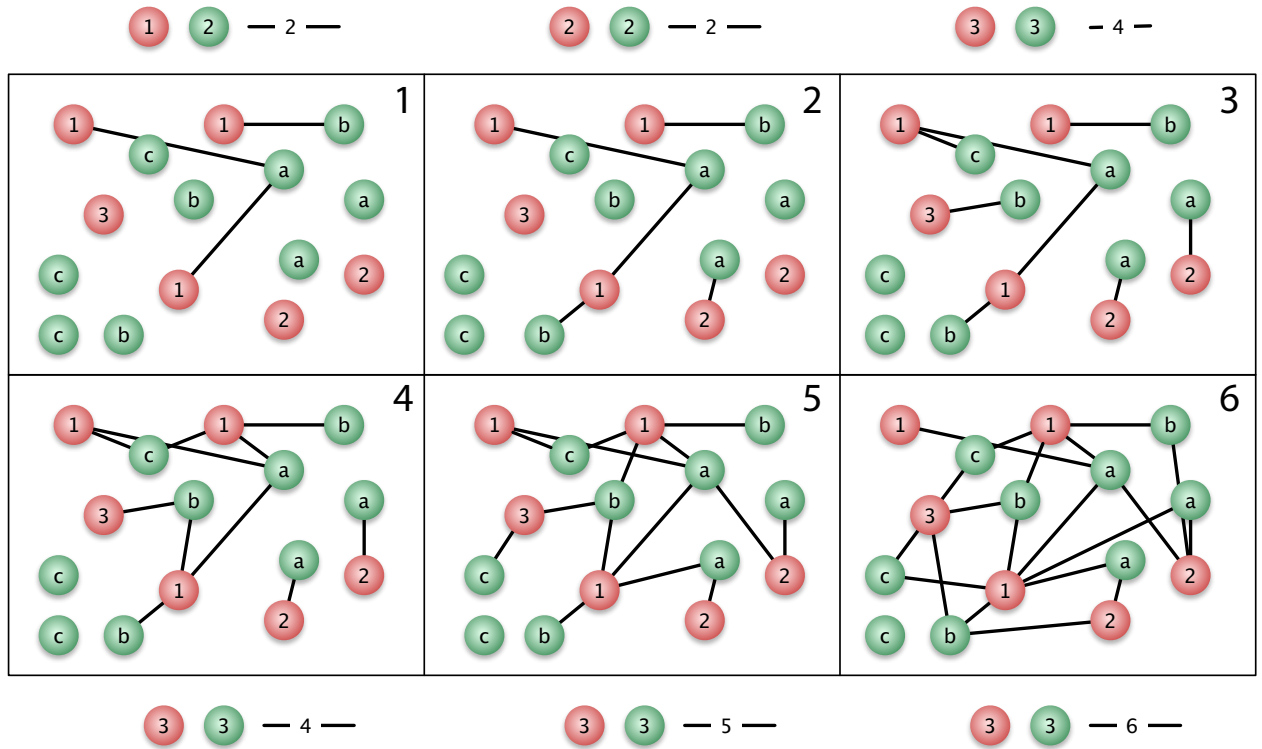

Jordano - Figure 1

## 765 Table captions

766 **Table 1.** A taxonomy of link types for ecological interactions (Olesen *et al.* 2011).  
767  $A$ , number of animal species;  $P$ , number of plant species;  $I$ , number of observed  
768 links;  $C = 100I/(AP)$ , connectance;  $FL$ , number of forbidden links; and  $ML$ ,  
769 number of missing links. As natural scientists, our ultimate goal is to eliminate  
770  $ML$  from the equation  $FL = AP - I - ML$ , which probably is not feasible given  
771 logistic sampling limitations. When we, during our study, estimate  $ML$  to be  
772 negligible, we cease observing and estimate  $I$  and  $FL$ .

773

774 **Table 2.** Frequencies of different type of forbidden links in natural plant-animal  
775 interaction assemblages.  $AP$ , maximum potential links,  $I_{max}$ ;  $I$ , number of ob-  
776 served links;  $UL$ , number of unobserved links;  $FL$ , number of forbidden links;  
777  $FL_P$ , phenology;  $FL_S$ , size restrictions;  $FL_A$ , accessibility;  $FL_O$ , other types of  
778 restrictions;  $ML$ , unknown causes (missing links). Relative frequencies (in paren-  
779 theses) calculated over  $I_{max} = AP$  for  $I$ ,  $ML$ , and  $FL$ ; for all forbidden links types,  
780 calculated over  $FL$ . References, from left to right: Olesen *et al.* 2008; Olesen &  
781 Myrthue unpubl.; Snow & Snow 1972 and Jordano *et al.* 2006; Vizentin-Bugoni  
782 *et al.* 2014; Jordano *et al.* 2009; Olesen *et al.* 2011.

783

784 **Table 3.** A vectorized interaction matrix.

785

786 **Table 4.** Sampling statistics for three plant-animal interaction networks (Olesen  
787 *et al.* 2011). Symbols as in Table 1;  $N$ , number of records;  $Chao1$  and  $ACE$  are  
788 asymptotic estimators for the number of distinct pairwise interactions  $I$  (Hortal



Jordano - Sampling networks

789 *et al.* 2006), and their standard errors;  $C$ , sample coverage for rare interactions  
790 (Chao & Jost 2012). Scaled asymptotic estimators and their confidence intervals  
791 ( $CI$ ) were calculated by weighting  $Chao1$  and  $ACE$  with the observed frequencies  
792 of forbidden links.

793

## 794 Tables

Table 1:

| Link type        | Formulation        | Definition                                                                                                                                                       |
|------------------|--------------------|------------------------------------------------------------------------------------------------------------------------------------------------------------------|
| Potential links  | $I_{max} = AP$     | Size of network matrix, i.e. maximum number of potentially observable interactions; $A$ and $P$ , numbers of interacting animal and plant species, respectively. |
| Observed links   | $I$                | Total number of observed links in the network given a sufficient sampling effort. Number of ones in the adjacency matrix.                                        |
| Unobserved links | $UL = I_{max} - I$ | Number of zeroes in the adjacency matrix.                                                                                                                        |
| Forbidden links  | $FL$               | Number of links, which remain unobserved because of linkage constraints, irrespectively of sufficient sampling effort.                                           |
| Missing links    | $ML = AP - I - FL$ | Number of links, which may exist in nature but need more sampling effort and/or additional sampling methods to be observed.                                      |

Table 2:

| Link type | Pollination      |                 |                             | Seed dispersal   |                 |                     |
|-----------|------------------|-----------------|-----------------------------|------------------|-----------------|---------------------|
|           | Zackenber<br>g   | Grundvad        | Arima<br>Valley             | Sta.<br>Virginia | Hato<br>Ratón   | Nava<br>Correhuelas |
| $I_{max}$ | 1891             | 646             | 522                         | 423              | 272             | 825                 |
| $I$       | 268<br>(0.1417)  | 212<br>(0.3282) | 185<br>(0.3544)             | 86<br>(0.1042)   | 151<br>(0.4719) | 181<br>(0.2194)     |
| $UL$      | 1507<br>(0.7969) | 434<br>(0.6718) | 337<br>(0.6456)             | 337<br>(0.4085)  | 169<br>(0.5281) | 644<br>(0.7806)     |
| $FL$      | 530<br>(0.3517)  | 107<br>(0.2465) | 218<br>(0.6469)             | 260<br>(0.7715)  | 118<br>(0.6982) | 302<br>(0.4689)     |
| $FL_P$    | 530<br>(1.0000)  | 94<br>(0.2166)  | 0<br>(0.0000)               | 120<br>(0.1624)  | 67<br>(0.3964)  | 195<br>(0.3028)     |
| $FL_S$    | ... (...)        | 8<br>(0.0184)   | 30<br>(0.0890)              | 140<br>(0.1894)  | 31<br>(0.1834)  | 46 (0.0714)         |
| $FL_A$    | ... (...)        | 5<br>(0.0115)   | 150<br>(0.445) <sup>a</sup> | ... (...)        | 20<br>(0.1183)  | 61 (0.0947)         |
| $FL_O$    | ... (...)        | ... (...)       | 38<br>(0.1128) <sup>b</sup> | ... (...)        | ... (...)       | 363<br>(0.5637)     |
| $ML$      | 977<br>(0.6483)  | 327<br>(0.7535) | 119<br>(0.3531)             | 77<br>(0.1042)   | 51<br>(0.3018)  | 342<br>(0.5311)     |

<sup>a</sup>, Lack of accessibility due to habitat uncoupling, i.e., canopy-foraging species vs. understory species.

<sup>b</sup>, Colour restrictions, and reward per flower too small relative to the size of the bird.

Jordano - Sampling networks

Table 3:

| Interaction                                               | Sample 1 | Sample 2 | Sample 3 | ... | Sample $i$ |
|-----------------------------------------------------------|----------|----------|----------|-----|------------|
| A1 - P2                                                   | 12       | 2        | 0        | ... | 6          |
| A1 - P2                                                   | 0        | 0        | 0        | ... | 1          |
| ...                                                       | ...      | ...      | ...      | ... | ...        |
| A5 - P3                                                   | 5        | 0        | 1        | ... | 18         |
| A5 - P4                                                   | 1        | 0        | 1        | ... | 3          |
| ...                                                       | ...      | ...      | ...      | ... | ...        |
| A <sub><math>i</math></sub> - P <sub><math>i</math></sub> | 1        | 0        | 1        | ... | 2          |

Jordano - Sampling networks

Table 4:

|                                  | Hato Ratón    | Nava Correhuelas | Zackenberg    |
|----------------------------------|---------------|------------------|---------------|
| <i>A</i>                         | 17            | 33               | 65            |
| <i>P</i>                         | 16            | 25               | 31            |
| <i>I<sub>max</sub></i>           | 272           | 825              | 1891          |
| <i>N</i>                         | 3340          | 8378             | 1245          |
| <i>I</i>                         | 151           | 181              | 268           |
| <i>C</i>                         | 0.917         | 0.886            | 0.707         |
| <i>Chao1</i>                     | 263.1 ± 70.9  | 231.4 ± 14.2     | 509.6 ± 54.7  |
| <i>ACE</i>                       | 240.3 ± 8.9   | 241.3 ± 7.9      | 566.1 ± 14.8  |
| <i>Scaled Chao</i>               | 195.4         | 162.7            | 308.4         |
| <i>CI</i>                        | [124.5–266.3] | [148.5–176.9]    | [253.6–363.1] |
| <i>Scaled ACE</i>                | 178.5         | 169.7            | 342.6         |
| <i>CI</i>                        | [169.5–187.4] | [161.8–177.6]    | [327.8–357.4] |
| % <i>unobserved</i> <sup>a</sup> | 8.33          | 15.38            | 47.80         |

<sup>a</sup>, estimated with library Jade (R Core Development Team 2010, Chao *et al.* 2015)
